# Supplementary material for: Effect of Photoconversion Coatings for Greenhouses on Electrical Signal-Induced Resistance to Heat Stress of Tomato Plants
Source: MDPI journal article supplement (doi:10.3390/plants11020229), 2022-01-17
Supplement: s1 [file s1]

## Supplementary Materials

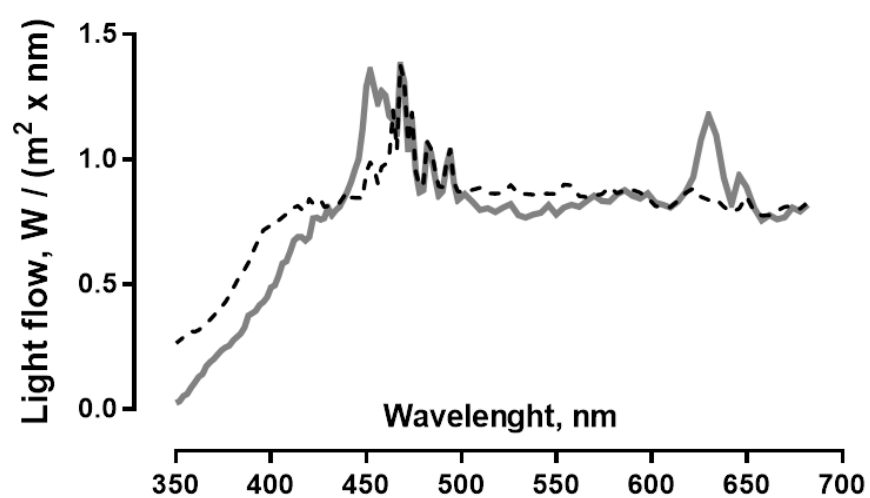

**Figure S1.** Photoluminescence spectrum of a fluoropolymer film containing fluorophores and gold nanoparticles (solid line) and without photoconverting components (dotted line), obtained using a xenon reference light source.
